# Supplementary material for: Hierarchical chromatin regulation during blood formation uncovered by single-cell sortChIC
Source: bioRxiv or medRxiv preprint supplement (doi:10.1101/2021.04.26.440606), 2021-04-26
Supplement: Supplementary file [file media-1.pdf]

## **Supplementary information**

### **Hierarchical chromatin regulation during blood formation uncovered by single-cell sortChIC**

Peter Zeller\*, Jake Yeung\*, Buys Anton de Barbanson, Helena Viñas Gaza, Maria Florescu, and Alexander van Oudenaarden

Oncode Institute, Hubrecht Institute-KNAW (Royal Netherlands Academy of Arts and Sciences) and University Medical Center Utrecht, 3584 CT, Utrecht, The Netherlands

\*These authors contributed equally

Correspondence: a.vanoudenaarden@hubrecht.eu (A.v.O.)

#### **This PDF file includes:**

Figs. S1 to S6

Tables S2

#### **Other Supplementary Materials for this manuscript include the following:**

Tables S1 and S3

**Figure S1**

**A**

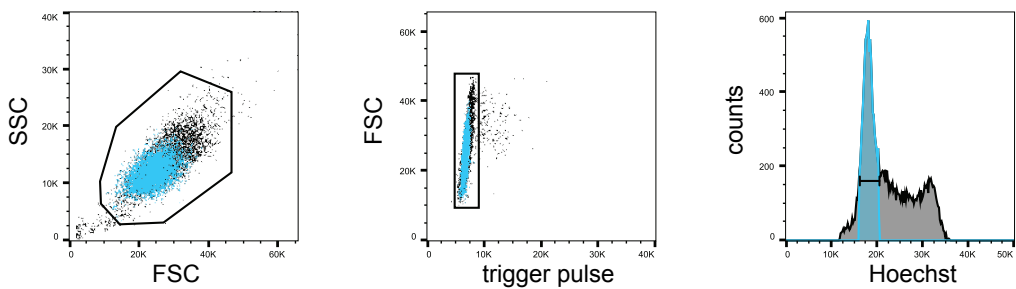

**B**

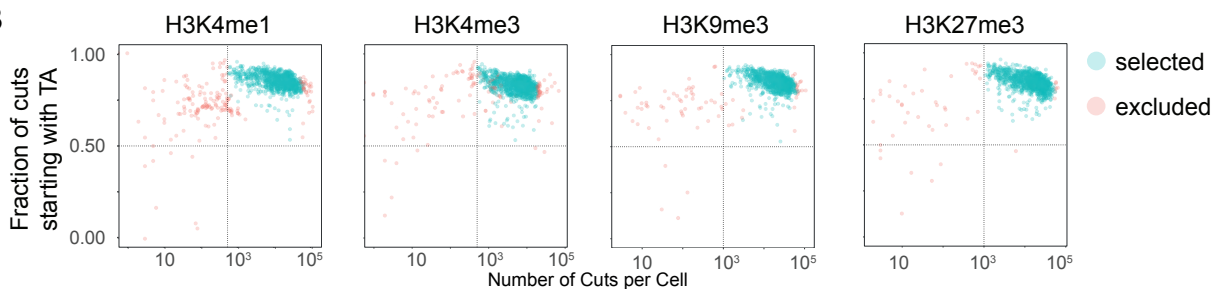

**C**

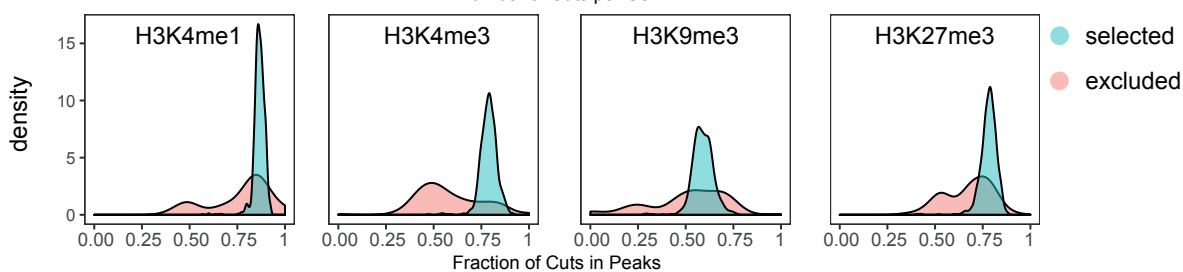

**D**

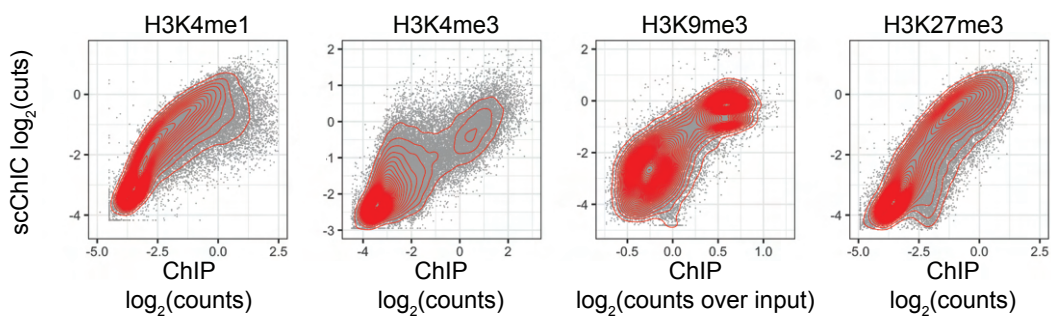

**E**

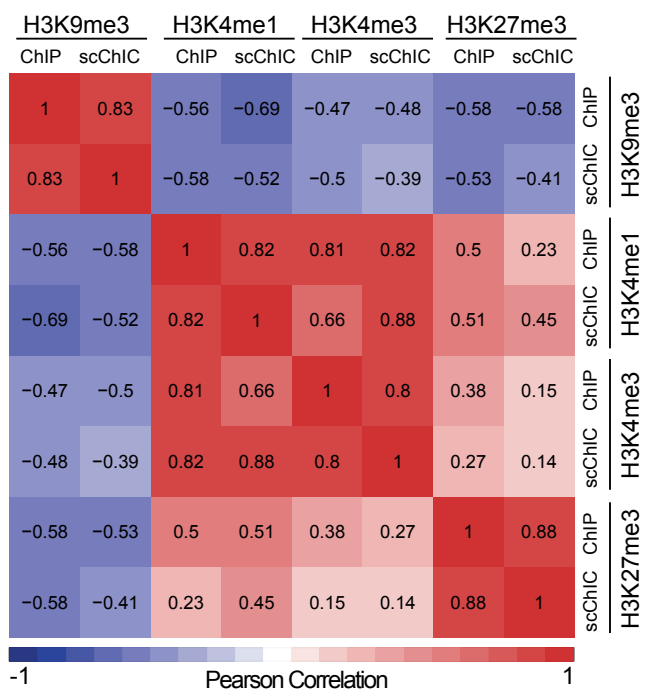

**F**

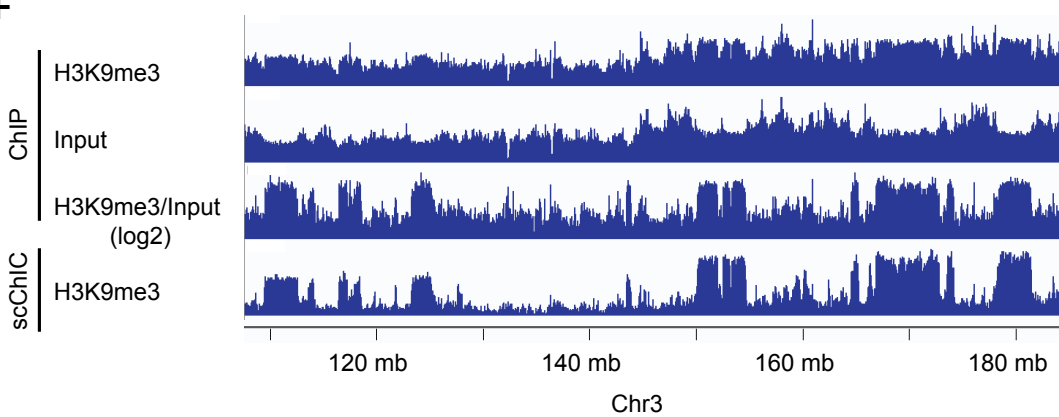

**Figure S1. sortChIC generates high-resolution maps of histone modifications in single cells.** (A) FACS plots for sorting individual K562 cells in G1 phase. (B) Fraction of cuts starting with TA (reflecting the preference of MNase to cut in an AT context) versus number of cuts mapped to the K562 genome. Cells below horizontal dotted lines and left of vertical lines are excluded from the analysis. (C) Distribution of fraction of cuts mapped to locations within peaks across cells. (D) Correlation between pseudobulk sortChIC and bulk ChIP signal using 50 kilobase (kb) bins for H3K4me1, H3K4me3, H3K27me3, and H3K9me3. (E) Pearson correlation between pseudobulk sortChIC and bulk ChIP signal using 50 kb bins across the four histone marks. (F) Three tracks of H3K9me3 ChIP-seq bulk data, one for H3K9me3 without normalization (H3K9me3), one for the input (Input), and one where H3K9me3 is normalized to the input (H3K9me3/input). Fourth track is H3K9me3 sortChIC pseudobulk, showing that H3K9me3 ChIP-seq requires normalizing by input to resemble sortChIC.

**Figure S2**

**A**

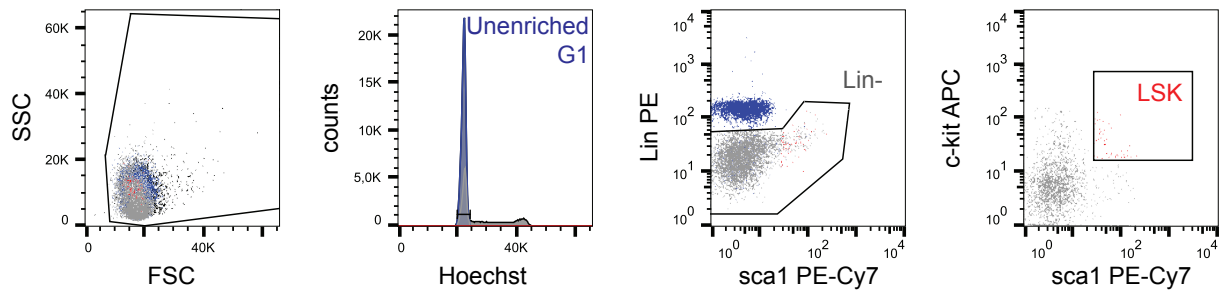

**B**

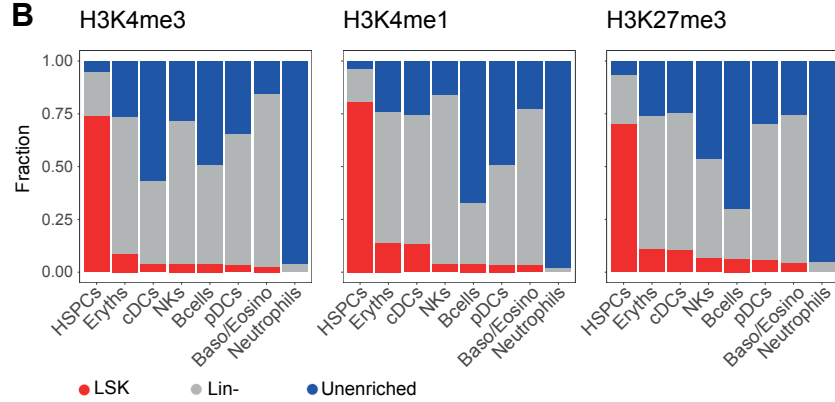

**C**

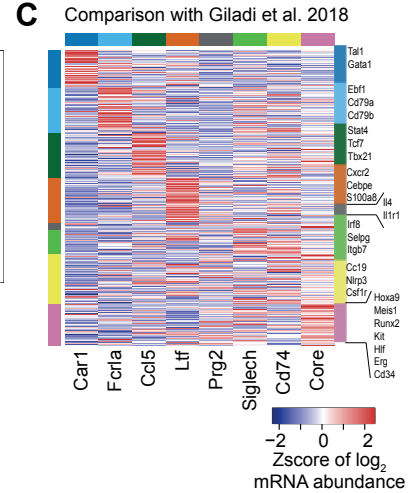

**D**

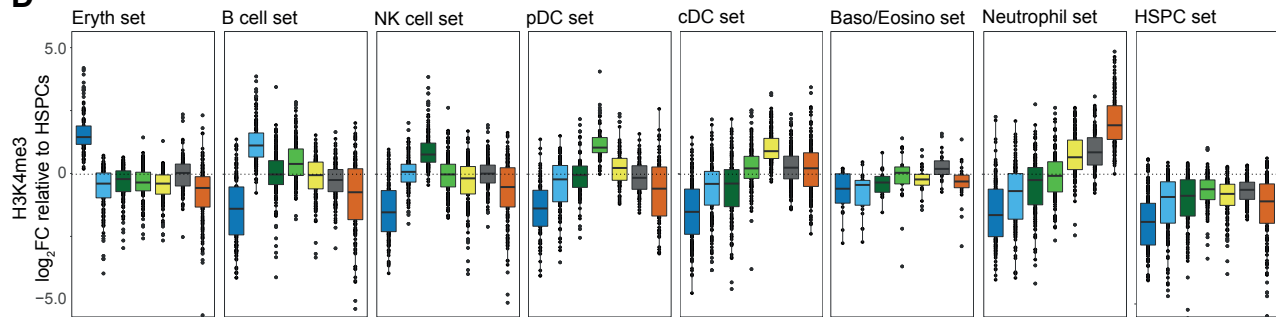

**E**

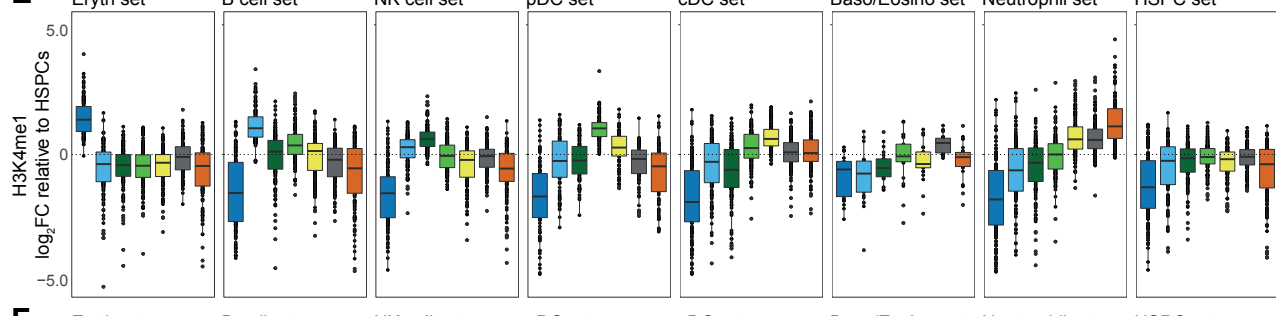

**F**

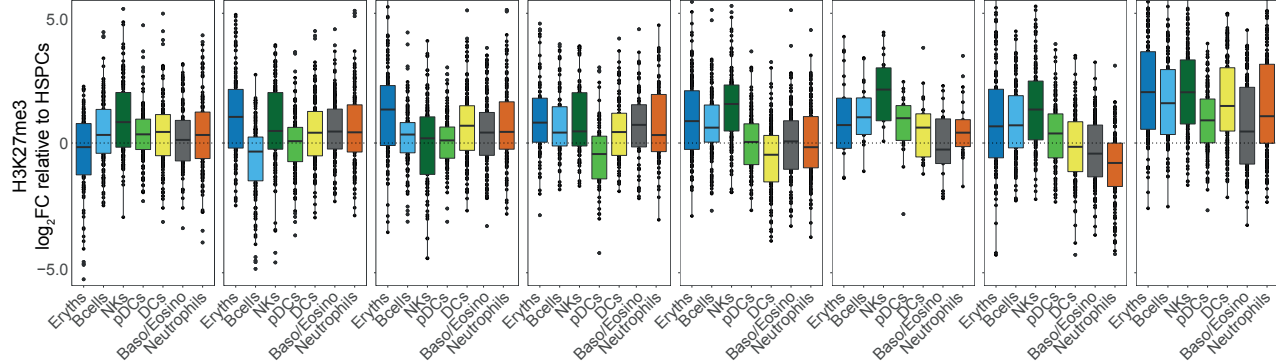

**Figure S2. H3K4me1 and H3K4me3 in HSPCs prime for different blood cell fates, while H3K27me3 in differentiated cell types silences genes of alternative cell fates.** (A) FACS plot for sorting G1 cells of whole bone marrow (unenriched), lineage negative (Lin<sup>-</sup>), and Lin<sup>-</sup>, Sca1<sup>+</sup>, cKit<sup>+</sup> (LSK) populations. (B) Fraction of cells in each cell type labeled by the sorted population: whole bone marrow (unenriched), lineage negative (Lin<sup>-</sup>), and Lin<sup>-</sup>Sca1<sup>+</sup>cKit<sup>+</sup> (LSK). (C) Cell type-specific mRNA abundances for genes associated with regions in Fig. 2E using pseudobulk analysis of the Giladi et al. 2018 dataset (Methods). (D) H3K4me3 fold changes of different cell types relative to HSPCs at cell type-specific regions. Each panel corresponds to a set of cell type-specific regions defined by the rows of one color in the heatmap of Fig. 2E. Regions are defined by +/- 5 kilobase windows centered at transcription start sites of cell type-specific genes. (E) Same as (D) but for H3K4me1. (F) Same as (D) but for H3K27me3.

# Figure S3

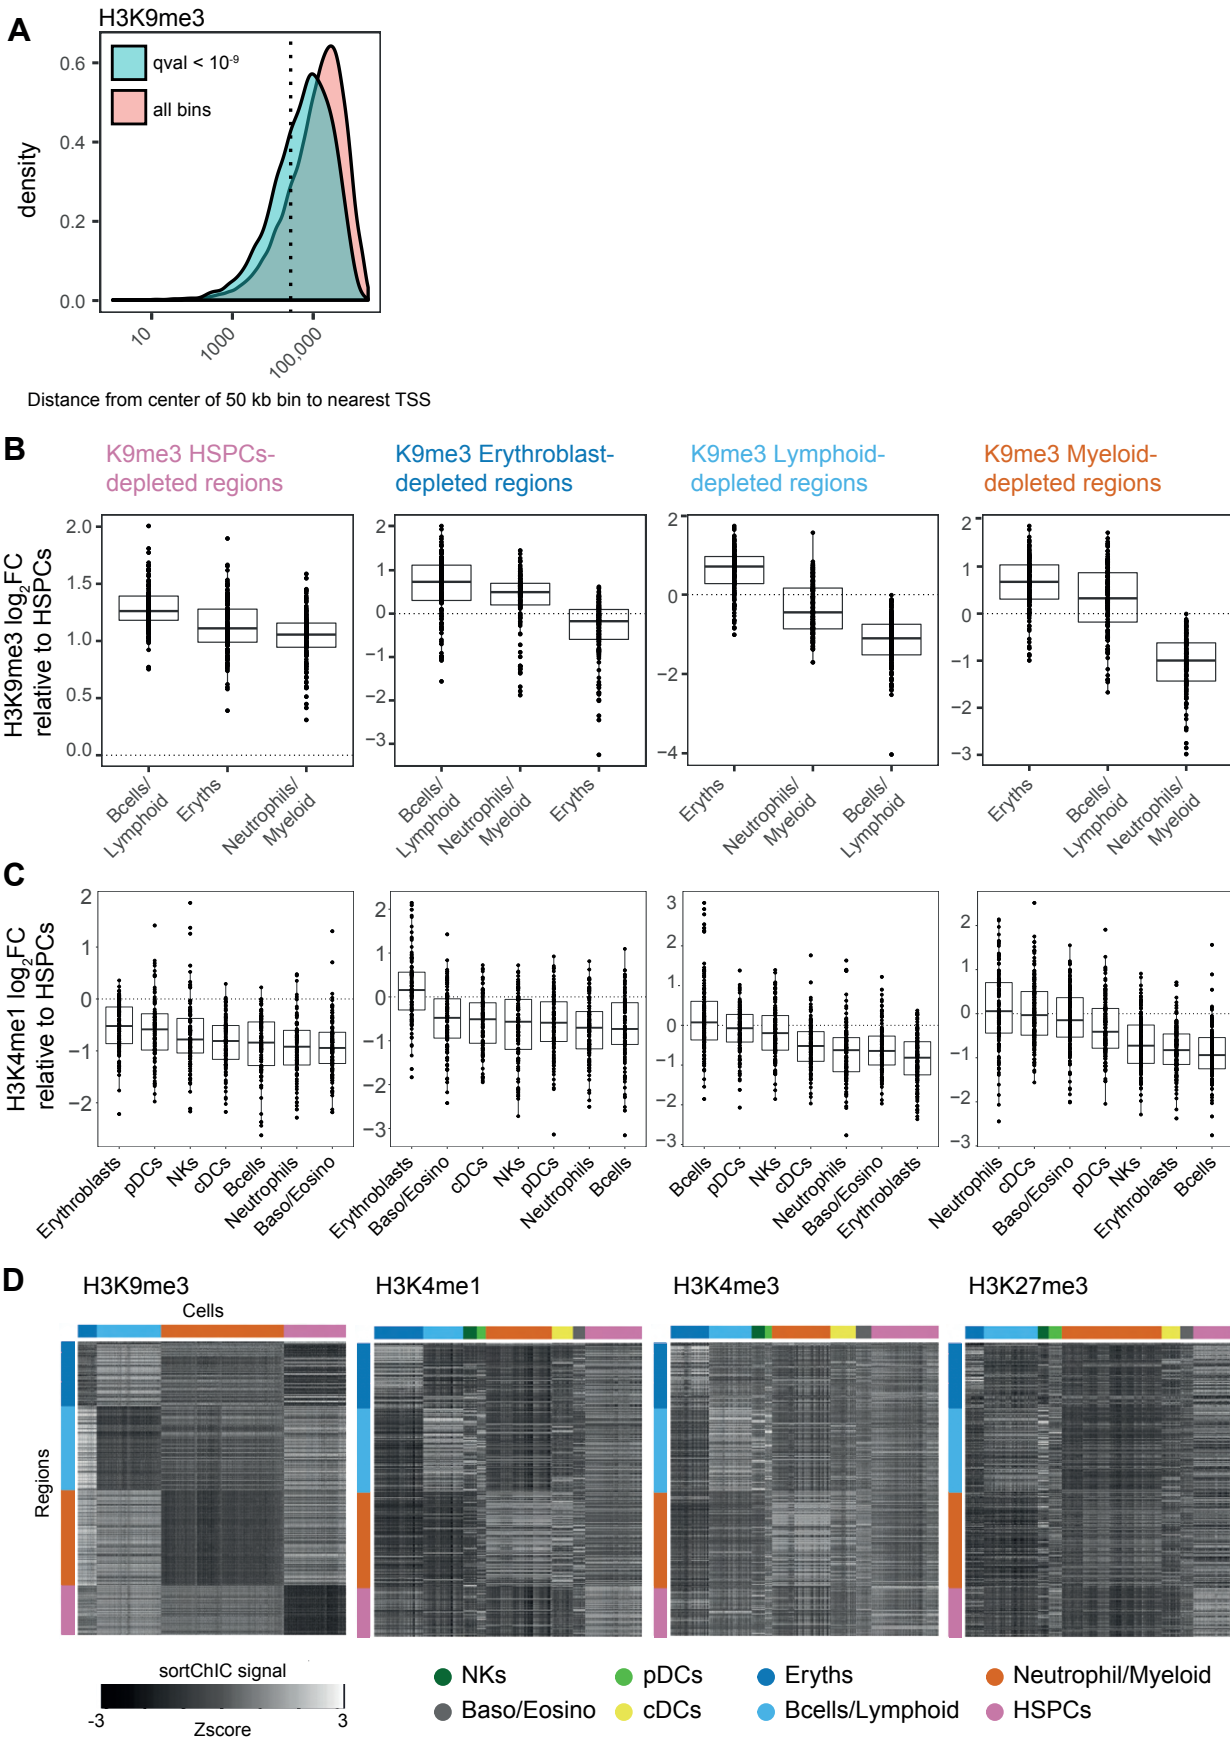

**Figure S3. Lineage-specific loss of H3K9me3 correlates with cell type-specific increase in H3K4me1.** (A) Statistically significant 50 kb regions (adjusted p-value <  $10^9$ , deviance goodness-of-fit test) identified for H3K9me3, showing distribution of distances from center of 50 kb region to nearest gene. All bins are identified as 50 kb regions that have pseudobulk (counts summed across all cells) signal above background levels (Methods). Dotted line represents 25 kb, meaning the bin would overlap with a TSS. (B) Fold change in H3K9me3 relative to HSPCs for four sets of 150 regions: regions depleted in erythroblasts, lymphoid, myeloid, or HSPCs. Each region is 50 kb wide. (C) The same four sets of regions but showing fold change in H3K4me1, showing upregulation of H3K4me1 specifically in cell types that are depleted in H3K9me3. (D) Heatmap of the four regions in single cells across the four marks. Rows are regions, color coded as in top of (B). Columns are cells, color coded as in bottom.

**Figure S4**

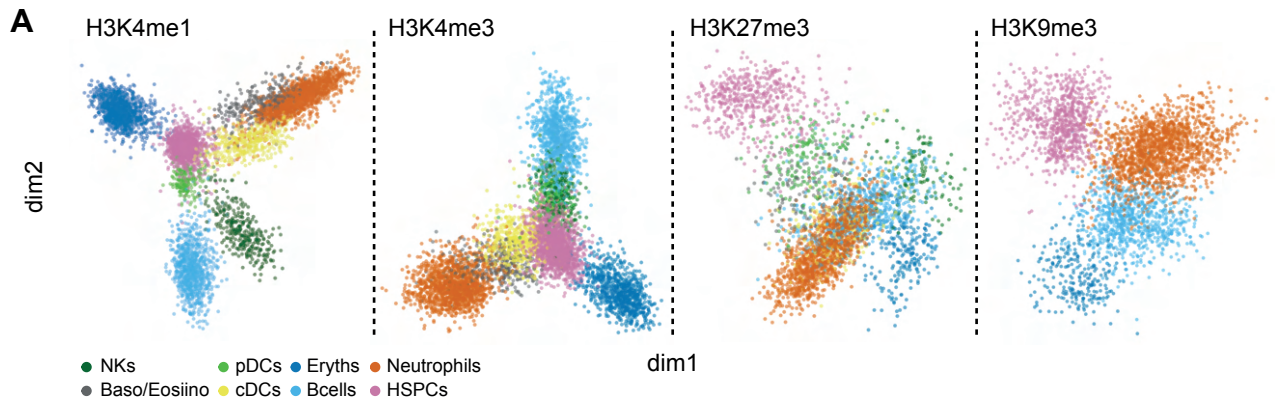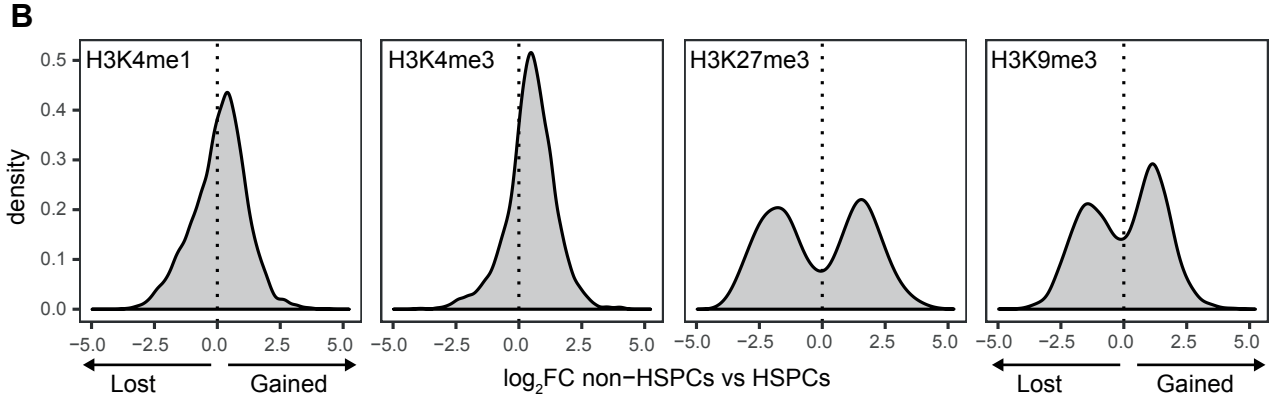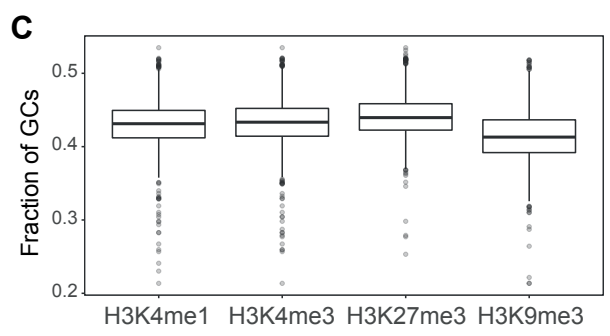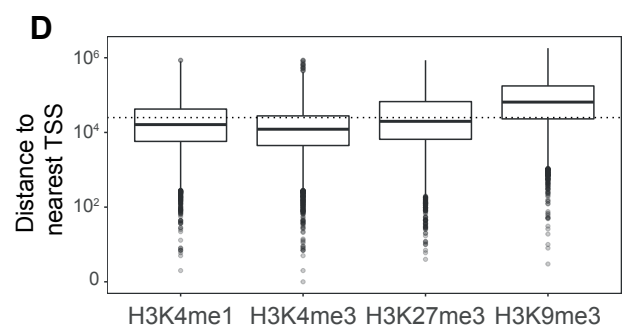

**E**

**H3K9me3 regions unique to HSPCs**

GO biological process  
 complement activation, classical pathway  
 phagocytosis, recognition  
 B cell receptor signaling pathway  
 phagocytosis, engulfment  
 positive regulation of B cell activation  
 defense response to bacterium  
 innate immune response  
 immunoglobulin production

| GO number  | P-value  | Enrichment (log <sub>2</sub> ) |
|------------|----------|--------------------------------|
| GO:0006958 | 5.68E-29 | 5.91                           |
| GO:0006910 | 1.86E-28 | 6.06                           |
| GO:0050853 | 3.58E-27 | 5.66                           |
| GO:0006911 | 1.25E-26 | 5.46                           |
| GO:0050871 | 4.69E-25 | 4.86                           |
| GO:0042742 | 2.33E-19 | 3.26                           |
| GO:0045087 | 5.08E-11 | 2.24                           |
| GO:0002377 | 8.09E-08 | 3.13                           |

**H3K27me3 regions unique to HSPCs**

GO biological process  
 locomotory behavior  
 central nervous system neuron differentiation  
 regulation of nervous system process  
 positive regulation of neuron differentiation  
 developmental growth involved in morphogenesis  
 neuromuscular process  
 memory  
 sensory perception of sound

| GO number  | P-value  | Enrichment (log <sub>2</sub> ) |
|------------|----------|--------------------------------|
| GO:0007626 | 9.29E-09 | 3.23                           |
| GO:0021953 | 5.14E-07 | 3.19                           |
| GO:0031644 | 1.74E-06 | 3.31                           |
| GO:0045666 | 2.10E-05 | 3.88                           |
| GO:0060560 | 4.64E-04 | 3.33                           |
| GO:0050905 | 3.76E-04 | 3.28                           |
| GO:0007613 | 2.81E-04 | 3.19                           |
| GO:0007605 | 1.37E-04 | 3.16                           |



**Figure S4. Features of active and repressive chromatin dynamics during hematopoiesis.** (A) Dimensionality reduction from GLMPCA (Methods) showing the two main latent factors explaining the sortChIC data for each mark. Dim 1 contains 8.2%, 8%, 7%, and 9.5% of the total L2 norm for H3K4me1, H3K4me3, H3K27me3, and H3K9me3, respectively. Dim 2 contains 7.9%, 6.8%, 6.8%, and 6.8% of the total L2 norm. (B) Distribution of  $\log_2$  fold changes (FC) at statistically significant changing bins (null model: a bin has constant signal across all cell types, full model: a bin has signal that depends on cell type, deviance goodness-of-fit test) between pseudobulk of non-HSPCs versus HSPCs. Bimodal distribution highlights differences originate mainly between HSPCs and non-HSPCs. (C) GC content of dynamic 50 kb bins for the four histone marks. (D) Distance to nearest TSS measured from the center of each dynamic 50 kb bin. Dotted horizontal line represents 25 kb, meaning the bin would overlap with a TSS. (E) Gene ontology (GO) terms of HSPC-specific H3K9me3 (top) and H3K27me3 (bottom) regions. P-value and enrichment from Fisher's exact test.

**Figure S5**

**A**

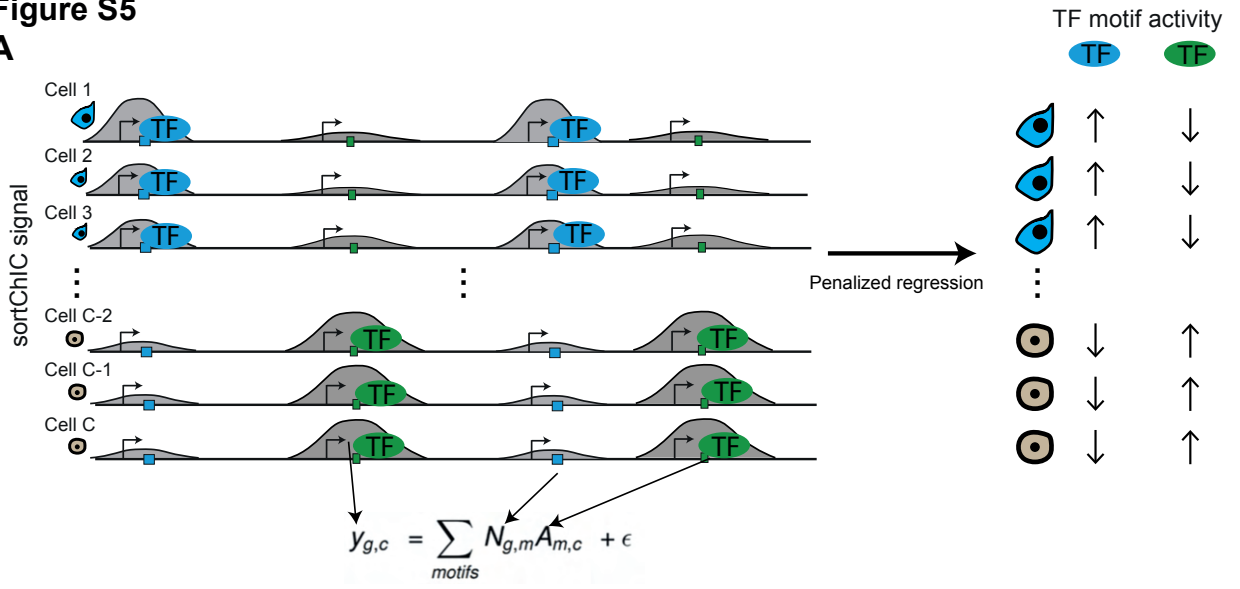

**B**

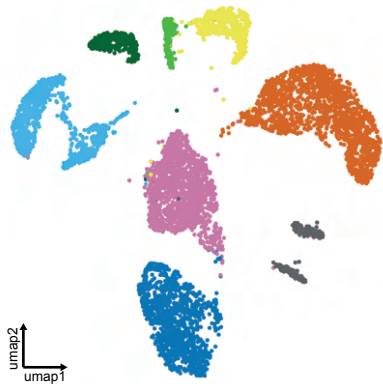

- Eryths
- Bcells
- HSPCs
- pDCs
- NKs
- Neutrophils
- cDCs
- Baso/Eosino

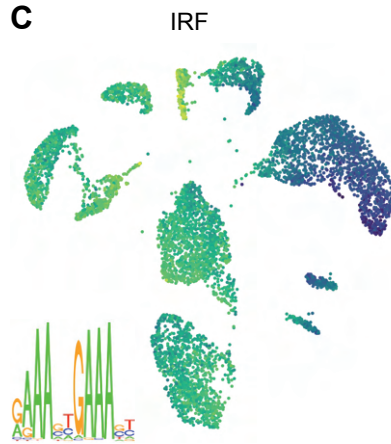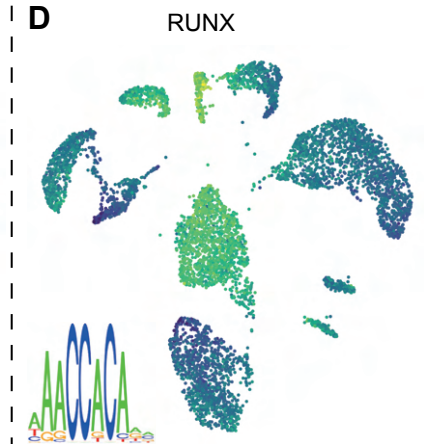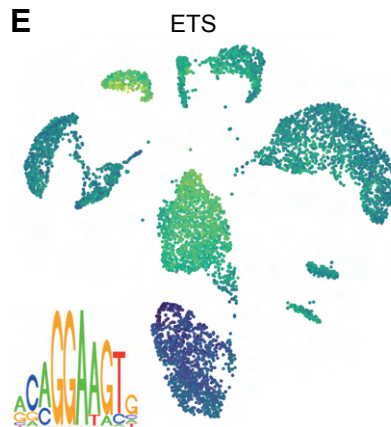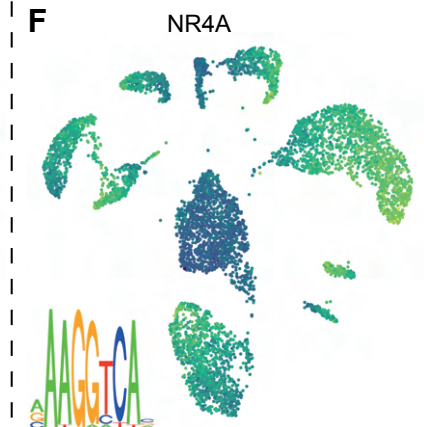

**Figure S5. Penalized regression model reveals transcription factor motifs underlying cell type-specific chromatin dynamics.** (A) Schematic of the transcription factor (TF) activity model. The penalized regression model takes the imputed sortChIC signal in a peak as the response variable and the TFbinding motifs predicted under each peak as the explanatory variable (Method). The penalized multivariate regression infers the TF motif activity driving cell type-specific sortChIC signal. (B) UMAP of H3K4me1 chromatin states in single cells, colored by cell type. (C-F) UMAP where each cell is colored by the TF activity inferred from the model. Four cell type-specific TF motifs are shown.

# Figure S6

## A H3K4me1 cell type-specific signal

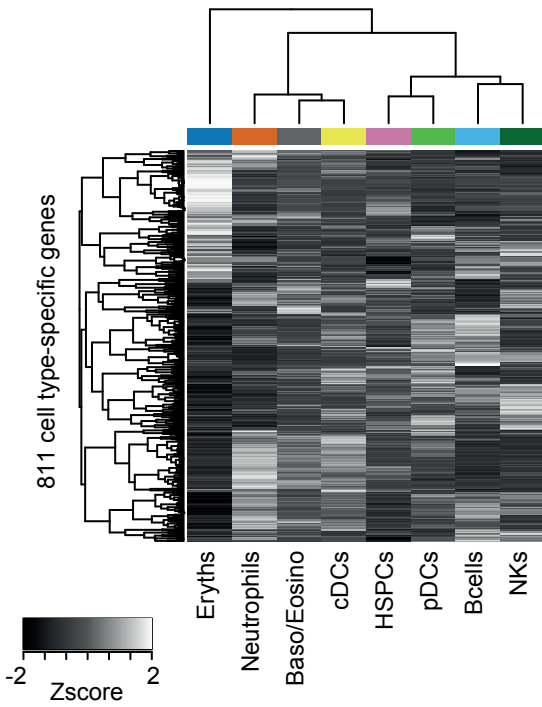

## B H3K9me3 cluster-specific signal

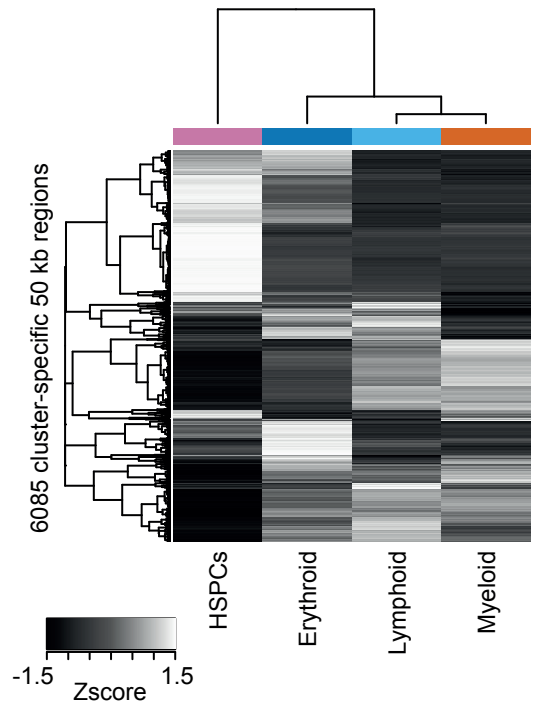

## C Counts for one cell

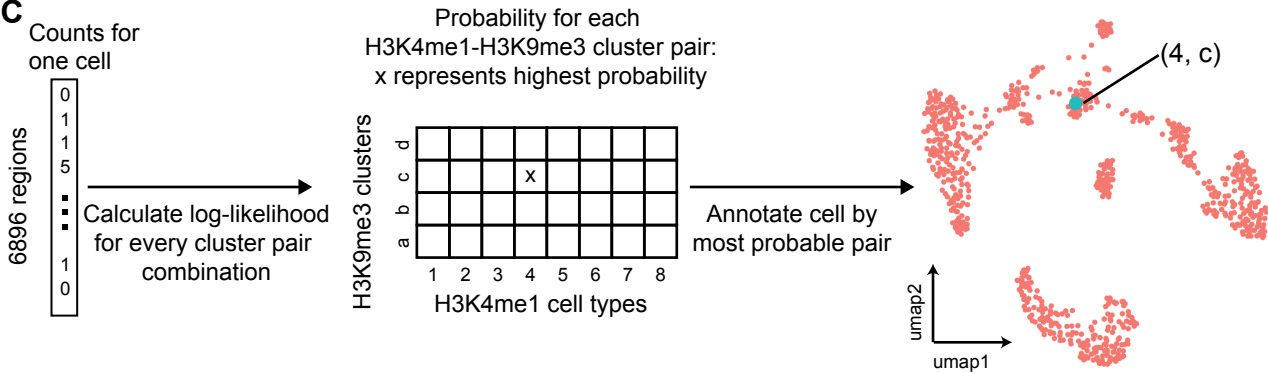

## D

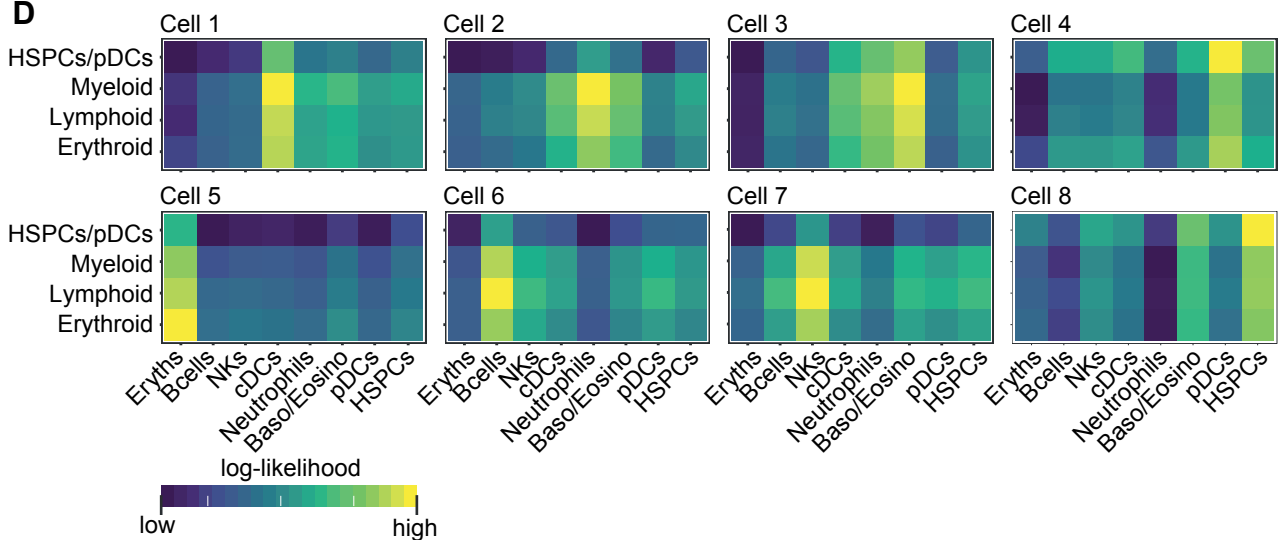

**Figure S6. Single-incubated data from H3K4me1 and H3K9me3 builds a model for inferring cluster-pairs in double-incubated data.** (A) Heatmap of H3K4me1 signal across clusters for 811 cell type-specific regions (Methods). These regions come from cell type-specific genes used in Figure 2E. (B) Heatmap of H3K9me3 signal across clusters for 6085 cluster-specific regions (50 kb genomic window). These regions come from the statistically significantly dynamic regions of H3K9me3 defined in Figure S3A. (C) Schematic of how a cluster-pair is inferred from each double-incubated cell. Each double-incubated cell has a vector of counts across 6896 regions (811 regions come from H3K4me1, while 6085 come from H3K9me3). We calculate the log-likelihood (Methods) of the observed double-incubated cell counts for each cluster-pair (32 cluster-pairs from 8 clusters in H3K4me1 and 4 clusters in H3K9me3). From the 32 log-likelihoods estimates, we assign the cell to the cluster-pair with the highest probability. (D) Examples of the 32 log-likelihood estimates from eight representative cells, shown as a 4-by-8 heatmap. Each of the four rows is a cluster from H3K9me3; each of the eight columns is a cluster from H3K4me1.

Table S2

|                                          | ChIP based        |                                      | pA-MNase based     |                |                           | pA-Tn5 based       |                       |                  |                        |                      |                |
|------------------------------------------|-------------------|--------------------------------------|--------------------|----------------|---------------------------|--------------------|-----------------------|------------------|------------------------|----------------------|----------------|
| Reference                                | Rotem et al. 2015 | Grosselin et al. 2019                | Hainer et al. 2019 | Ku et al. 2019 | This work                 | Harada et al. 2018 | Kaya-Okur et al. 2019 | Wang et al. 2019 | Bartosovik et al. 2021 | Janssens et al. 2020 | Wu et al. 2020 |
| Method                                   | Sc-ChIP           | High-throughput single-cell ChIP-seq | uliCUT&RUN         | scChIC-seq     | Sort-ChIC                 | ChIL-seq           | CUT&Tag               | CoBATC H         | scCut&Tag              | autoCUT &TAG         | scCut&Tag      |
| Integrated with FACS sorting             |                   |                                      |                    |                | Hoechst, Lin, sca1, c-kit |                    |                       |                  |                        |                      |                |
| Number of cells profiled (cell lines)    | 7308              | 0                                    | 172                | 387            | 4136                      | 15                 | 1764                  | 2161             | 8745                   | NA                   | 2794           |
| Number of cells profiled (primary cells) | 0                 | 7465                                 | 0                  | 285            | 12208                     | 0                  | 0                     | 3998             | 47340                  | 6000                 | 1311           |
| Approximate throughput (cells/run)       | 100               | 1000                                 | low                | low            | 4500 (384 per plate)      | low                | 1000                  | 2000             | 4000                   | 2500                 | 2794           |
| Approximate average number of reads/cell | 453-773           | 1630                                 | NA                 | 10000-15000    | 15000                     | 15000-350000       | NA                    | 7525-12000       | 48-453                 | 3900-13000           | 1729           |
| TFs and other non-histone proteins       |                   |                                      | CTCF, Nanog, Sox2  |                |                           |                    |                       | Pol2             | Olig2, Rad21           |                      |                |
| H3K4me1 (active)                         | X                 |                                      |                    |                | X                         |                    |                       |                  |                        |                      |                |
| H3K4me2 (active)                         | X                 | X                                    |                    |                |                           |                    | X                     |                  |                        |                      |                |
| H3K4me3 (active)                         |                   |                                      |                    | X              | X                         | X                  |                       |                  | X                      | X                    |                |
| H3K36me3 (active)                        |                   |                                      |                    |                |                           |                    |                       | X                | X                      | X                    |                |
| H3K27ac (active)                         |                   | X                                    |                    |                |                           | X                  |                       | X                | X                      |                      |                |
| H3K27me3 (repressive)                    |                   |                                      |                    | X              | X                         | X                  | X                     |                  | X                      | X                    | X              |
| H3K9me3 repressive)                      |                   |                                      |                    |                | X                         |                    |                       |                  |                        |                      |                |

Table S2. Comparison of studies on single-cell histone modification mapping.
